# Supplementary material for: CCL21 promotes the development of endometriosis by activating NF-κB signaling pathway
Source: Research Square preprint supplement (doi:10.21203/rs.3.rs-7558971/v1), 2025-10-23
Supplement: Supplementary file 1 [file c84698f9330e09614d2c7a9f.docx]

**Supplementary Material**

**Supplementary Figure 1.** The expression of IL-1β, and TNF-α in EuE and EcE from endometriosis patients and mice model. (A-B) Representative images showed inflammation-related proteins (IL-1β and TNF-α) in EuE and EcE of endometriosis patients. Scale bar, 100 µm. (C-D) Representative images showed inflammation-related proteins (IL-1β and TNF-α) in EuE and EcE of endometriosis mice model. Scale bar, 100 µm.

**
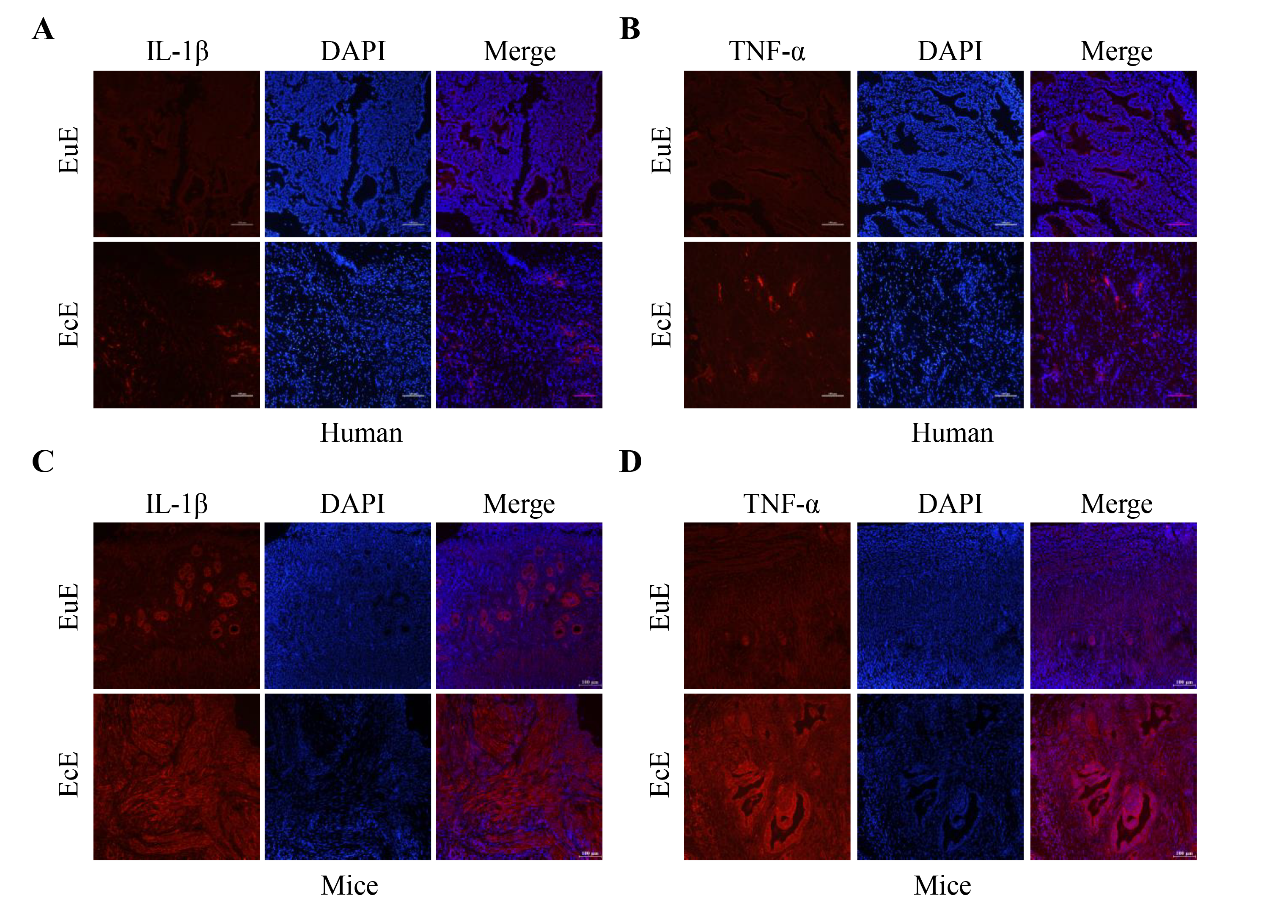
**

**Supplementary Figure 2.** The expression of ACKR1 and CFD in endometriotic lesions and normal endometrium of endometriosis patients in GSE5108 (A), GSE11691 (B), GSE23339 (C), and GSE25628 (D) datasets.


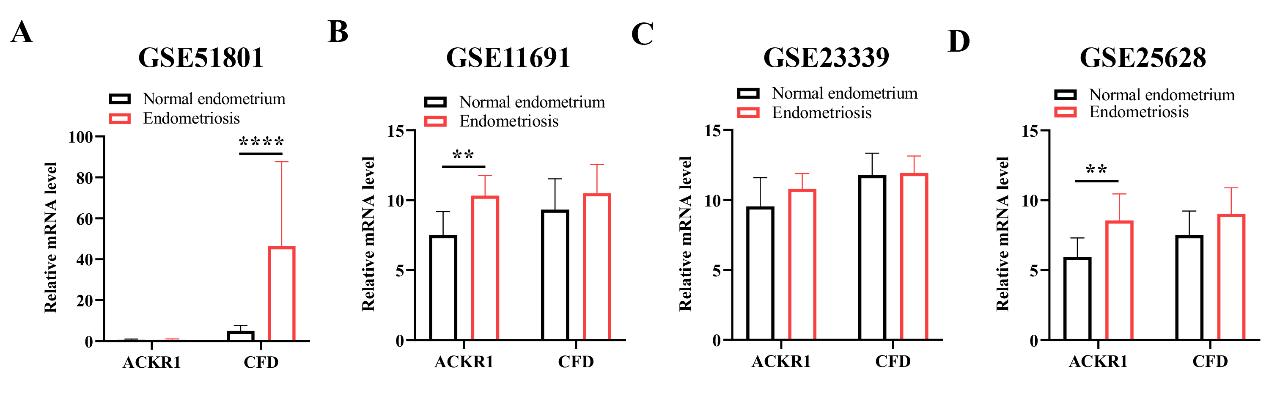


**Supplementary Figure 3.** (A) Representative images of CCL21 in EuE and EcE of endometriosis mice model. Scale bar, 100 µm.


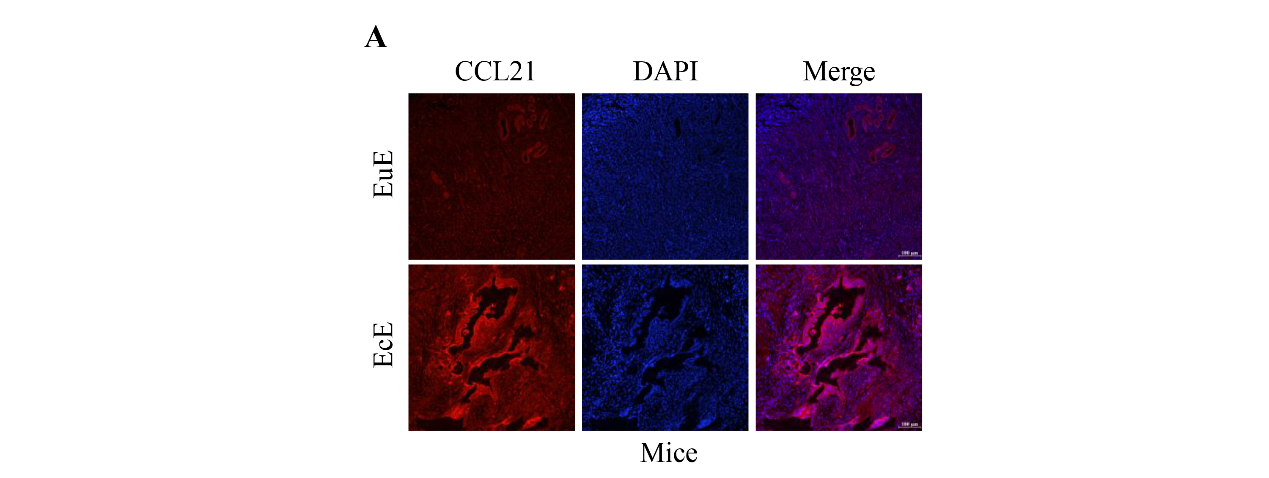


**Supplementary Figure 4.** (A) The expression of CCL21 in high-CCL21 group and low-CCL21 group. (B) Histogram of differentially expressed genes in high-CCL21 group and low-CCL21 group. (C) The top 30 up-regulated and down-regulated genes in high-CCL21 group versus low-CCL21 group.


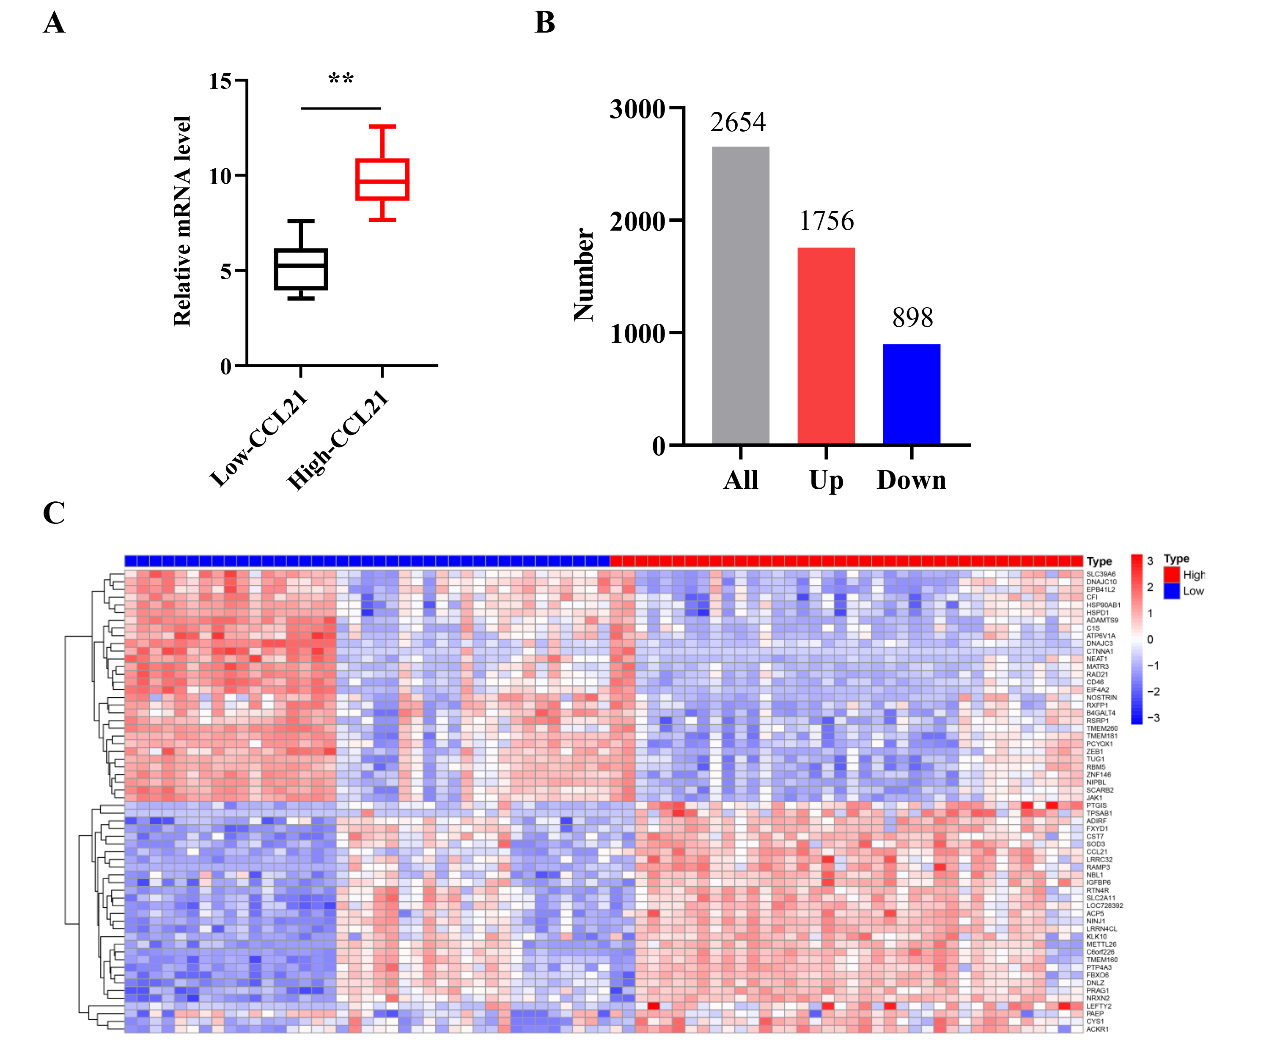


**Supplementary Figure 5.** (A) Representative images of NF-κB in EuE and EcE of endometriosis mice model. Scale bar, 100 µm.


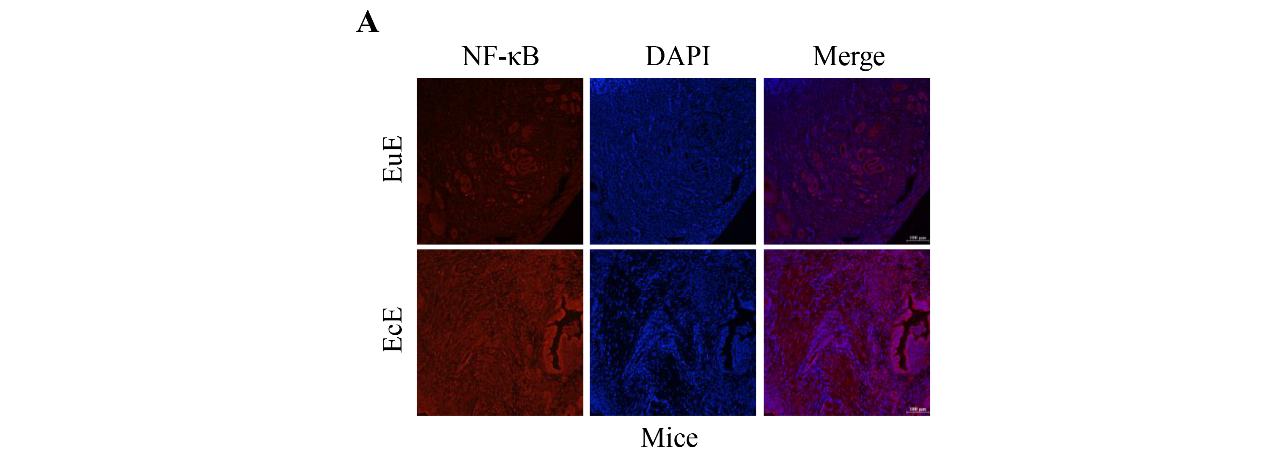


| **Dataset** | **Platform** | **Endometriosis (n)** | **Normal endometrium (n)** | **PMID** |
| --- | --- | --- | --- | --- |
| GSE7305 | GPL570 | 10 | 10 | 17640886 |
| GSE51981 | GPL570 | 77 | 34 | 25243856 |
| GSE5108 | GPL2895 | 11 | 11 | 17462640 |
| GSE11691 | GPL96 | 9 | 9 | 18688027 |
| GSE23339 | GPL6102 | 10 | 9 | 21436257 |
| GSE25628 | GPL571 | 16 | 6 | 23460397 |

**Supplementary Table 1.** Detailed information of GEO datasets.

**Supplementary Table 2.** Control andthree targeting sequences of CCL21 siRNA.

| **siRNA** | sense **(5’→3’)** | antisense **(5’→3’)** |
| --- | --- | --- |
| siRNA-1 (127-147) | CAGGACCCAAGGCAGUGAUTT | AUCACUGCCUUGGGUCCUGTT |
| siRNA-2 (155-175) | CAGGACUGUUGCCUCAAGUTT | ACUUGAGGCAACAGUCCUGTT |
| siRNA-3 (217-237) | GAAGCAGGAACCAAGCUUATT | UAAGCUUGGUUCCUGCUUCTT |
| Control | UUCUCCGAACGUGUCACGUTT | ACGUGACACGUUCGGAGAATT |

**Supplementary Table 3.** Specific primers for RT-qPCR.

| **Genes** | **Species** | **Forward (5’→3’)** | **Reverse (5’→3’)** |
| --- | --- | --- | --- |
| *IL-6* | Mouse | CTGCAAGAGACTTCCATCCAG | AGTGGTATAGACAGGTCTGTTGG |
| *TNF-α* | Mouse | CAGGCGGTGCCTATGTCTC | CGATCACCCCGAAGTTCAGTAG |
| *IL-1β* | Mouse | GAAATGCCACCTTTTGACAGTG | TGGATGCTCTCATCAGGACAG |
| *CCL21* | Mouse | GTGATGGAGGGGGTCAGGA | GGGATGGGACAGCCTAAACT |
| *GAPDH* | Mouse | AGGTCGGTGTGAACGGATTTG | TGTAGACCATGTAGTTGAGGTCA |
| *IL-6* | Human | ACTCACCTCTTCAGAACGAATTG | CCATCTTTGGAAGGTTCAGGTTG |
| *TNF-α* | Human | CCTCTCTCTAATCAGCCCTCTG | GAGGACCTGGGAGTAGATGAG |
| *IL-1β* | Human | ATGATGGCTTATTACAGTGGCAA | GTCGGAGATTCGTAGCTGGA |
| *CCL21* | Human | GTTGCCTCAAGTACAGCCAAA | AGAACAGGATAGCTGGGATGG |
| *GAPDH* | Human | GGAGCGAGATCCCTCCAAAAT | GGCTGTTGTCATACTTCTCATGG |
